# Supplementary material
Source: publisher figshare collection journal article supplement (https://acs.figshare.com/ndownloader/files/3601497)
Supplement: Supplementary file 1 [file 3601497]

## **Supporting Information**

**for**

### **Hairpin DNA Sequences Bound Strongly by Bleomycin Exhibit Enhanced Double-Strand Cleavage**

Basab Roy and Sidney M. Hecht\*

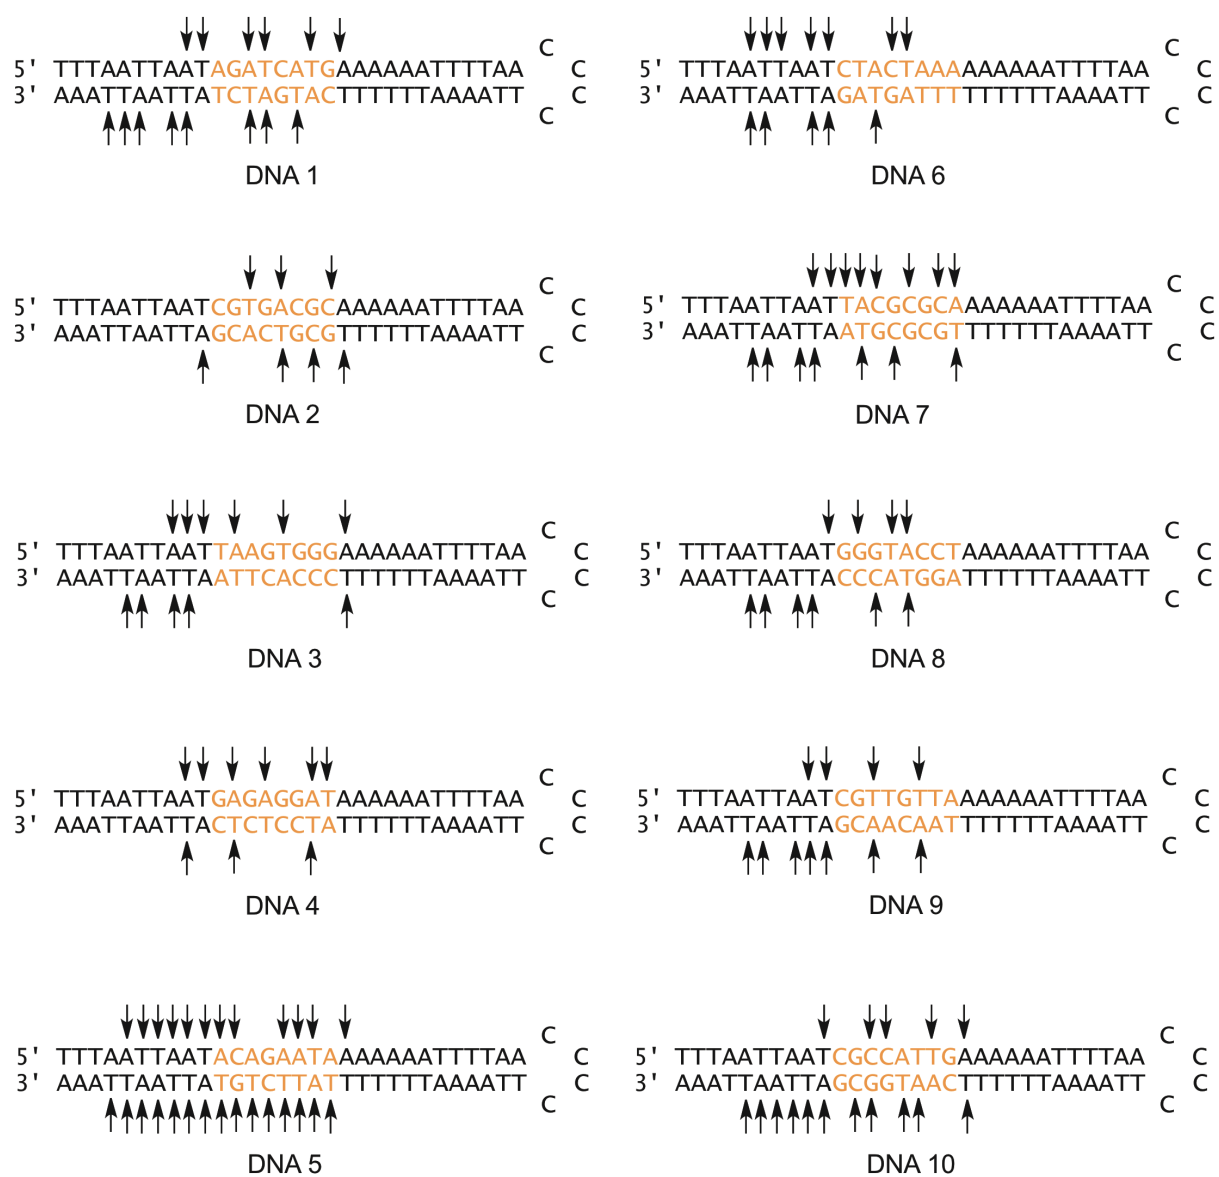

**Figure S1.** Sites of BLM-mediated damage for the ten hairpin DNAs studied.<sup>15</sup>

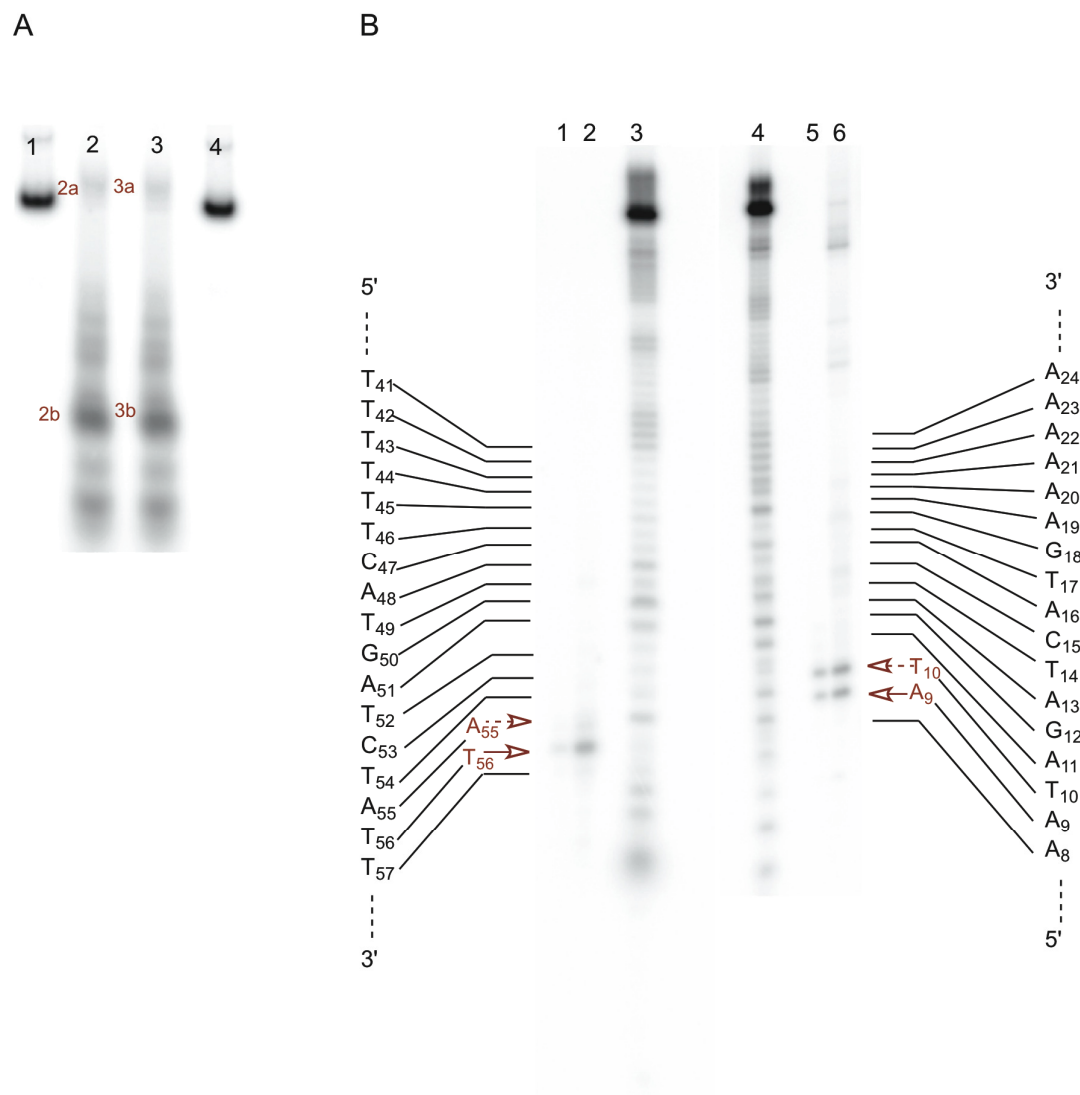

**Figure S2.** Analysis of Fe•bleomycin induced double-strand cleavage sites on hairpin DNA **1**. (A) Double-strand cleavage of [3'-<sup>32</sup>P]-end labeled (lanes 1 and 2) and [5'-<sup>32</sup>P]-end labeled (lanes 3 and 4) 64-nucleotide hairpin DNA **1** by bleomycin A<sub>5</sub>. Lane 1, [3'-<sup>32</sup>P]-end labeled DNA alone; lane 2, 5 μM Fe(II)•BLM A<sub>5</sub>; lane 3, 5 μM Fe(II)•BLM A<sub>5</sub>; lane 4, [5'-<sup>32</sup>P]-end labeled DNA alone. (B) Sequencing gel analysis of bleomycin induced double-strand cleavage sites on [3'-<sup>32</sup>P]-end labeled (lanes 1-3) and [5'-<sup>32</sup>P]-end labeled (lanes 4-6) DNA **1**. Each lane (except lanes 3 and 4) corresponds to a numbered cleavage band, shown in (A). Lane 1, band 2b; lane 2, band 2a; lane 3, Maxam-Gilbert G+A sequencing lane of [3'-<sup>32</sup>P]-end labeled DNA **1**; lane 4, Maxam-Gilbert G+A sequencing lane of [5'-<sup>32</sup>P]-end labeled DNA **1**; lane 5, band 3b; lane 6, band 3a.

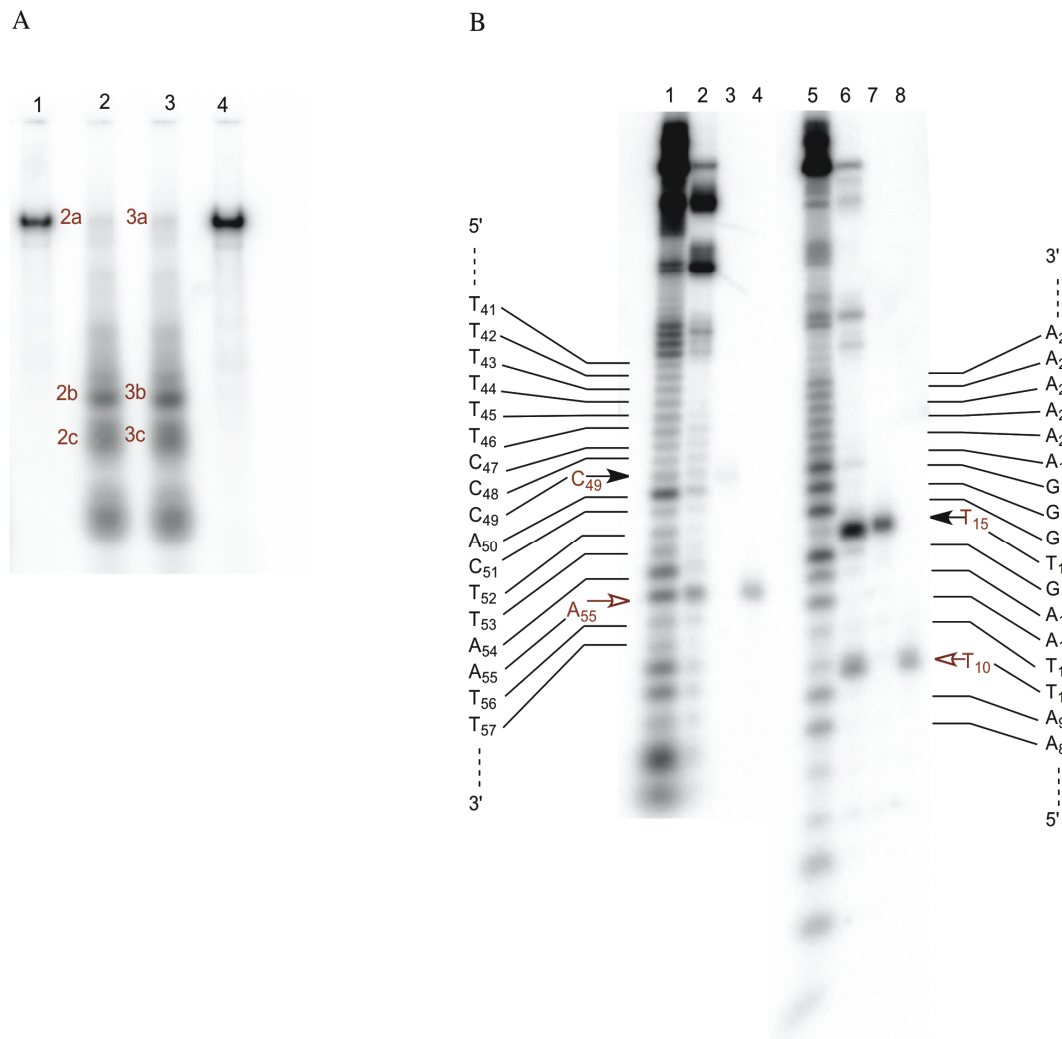

**Figure S3.** Analysis of Fe•bleomycin induced double-strand cleavage sites on hairpin DNA **3**. (A) Double strand cleavage of [3'-<sup>32</sup>P]-end labeled (lanes 1 and 2) and [5'-<sup>32</sup>P]-end labeled (lanes 3 and 4) 64-nucleotide hairpin DNA **3** by bleomycin A<sub>5</sub>. Lane 1, [3'-<sup>32</sup>P]-end labeled DNA alone; lane 2, 5 μM Fe(II)•BLM A<sub>5</sub>; lane 3, 5 μM Fe(II)•BLM A<sub>5</sub>; lane 4, [5'-<sup>32</sup>P]-end labeled DNA alone. (B) Sequencing gel analysis of bleomycin induced double-strand cleavage sites on [3'-<sup>32</sup>P]-end labeled (lanes 1-4) and [5'-<sup>32</sup>P]-end labeled (lanes 5-8) DNA **3**. Each lane (except lanes 1 and 5) corresponds to a numbered cleavage band, shown in (A). Lane 1, Maxam-Gilbert G+A sequencing lane of [3'-<sup>32</sup>P]-end labeled DNA **3**; lane 2, band 2a; lane 3, band 2b; lane 4, band 2c; Lane 5, Maxam-Gilbert G+A sequencing lane of [5'-<sup>32</sup>P]-end labeled DNA **3**; lane 6, band 3a; lane 7, band 3b; lane 8, band 3c.

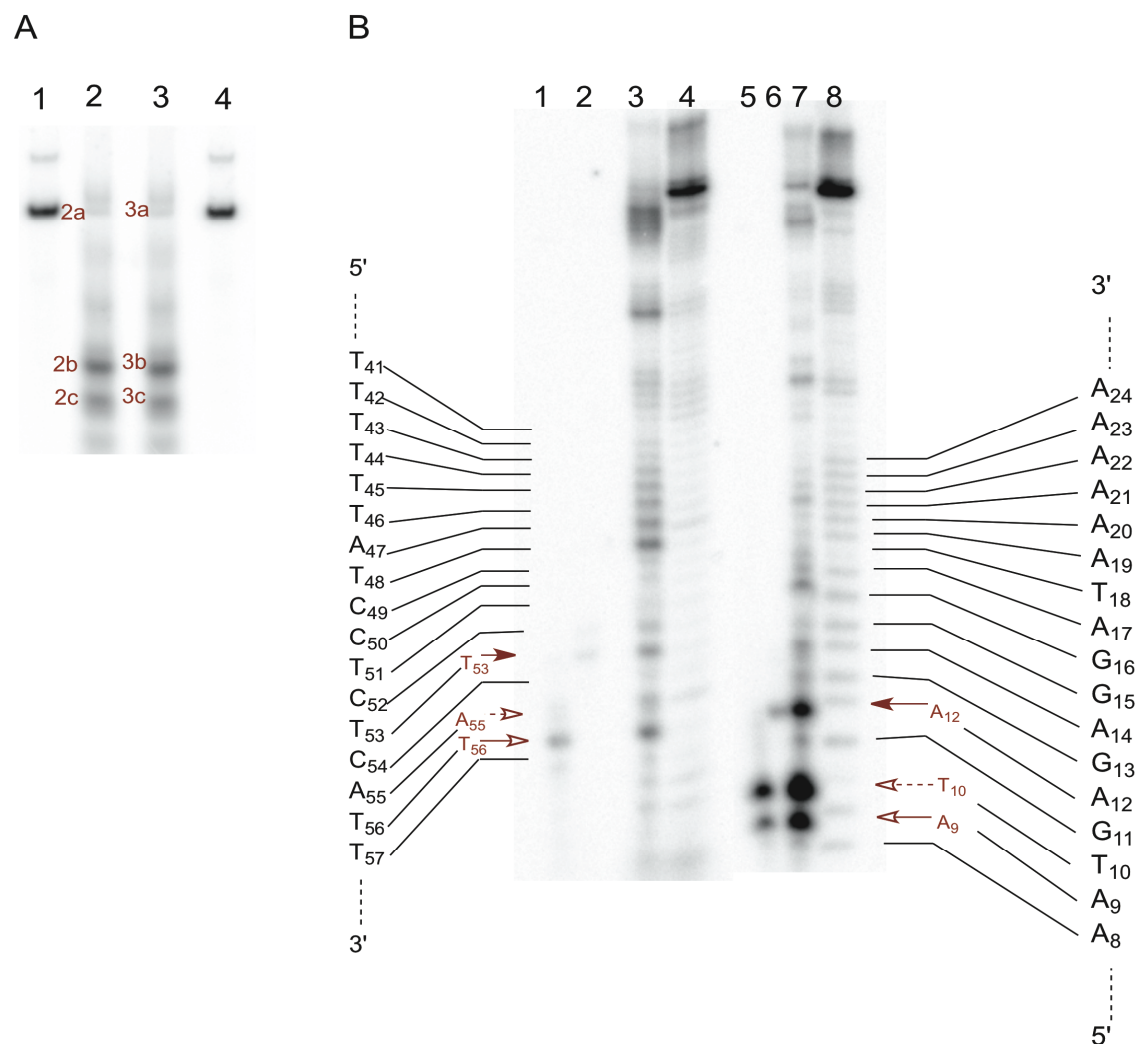

**Figure S4.** Analysis of Fe•bleomycin induced double-strand cleavage sites on hairpin DNA **4**. (A) Double strand cleavage of [3'-<sup>32</sup>P]-end labeled (lanes 1 and 2) and [5'-<sup>32</sup>P]-end labeled (lanes 3 and 4) 64-nucleotide hairpin DNA **4** by bleomycin A<sub>5</sub>. Lane 1, [3'-<sup>32</sup>P]-end labeled DNA alone; lane 2, 5 μM Fe(II)•BLM A<sub>5</sub>; lane 3, 5 μM Fe(II)•BLM A<sub>5</sub>; lane 4, [5'-<sup>32</sup>P]-end labeled DNA alone. (B) Sequencing gel analysis of bleomycin induced double-strand cleavage sites on [3'-<sup>32</sup>P]-end labeled (lanes 1-4) and [5'-<sup>32</sup>P]-end labeled (lanes 5-8) DNA **4**. Each lane (except lanes 4 and 8) corresponds to a numbered cleavage band, shown in (A). Lane 1, band 2c; lane 2, band 2b; lane 3, band 2a; lane 4, Maxam-Gilbert G+A sequencing lane of [3'-<sup>32</sup>P]-end labeled DNA **4**; lane 5, band 3c; lane 6, band 3b; lane 7, band 3a; lane 8, Maxam-Gilbert G+A sequencing lane of [5'-<sup>32</sup>P]-end labeled DNA **4**.

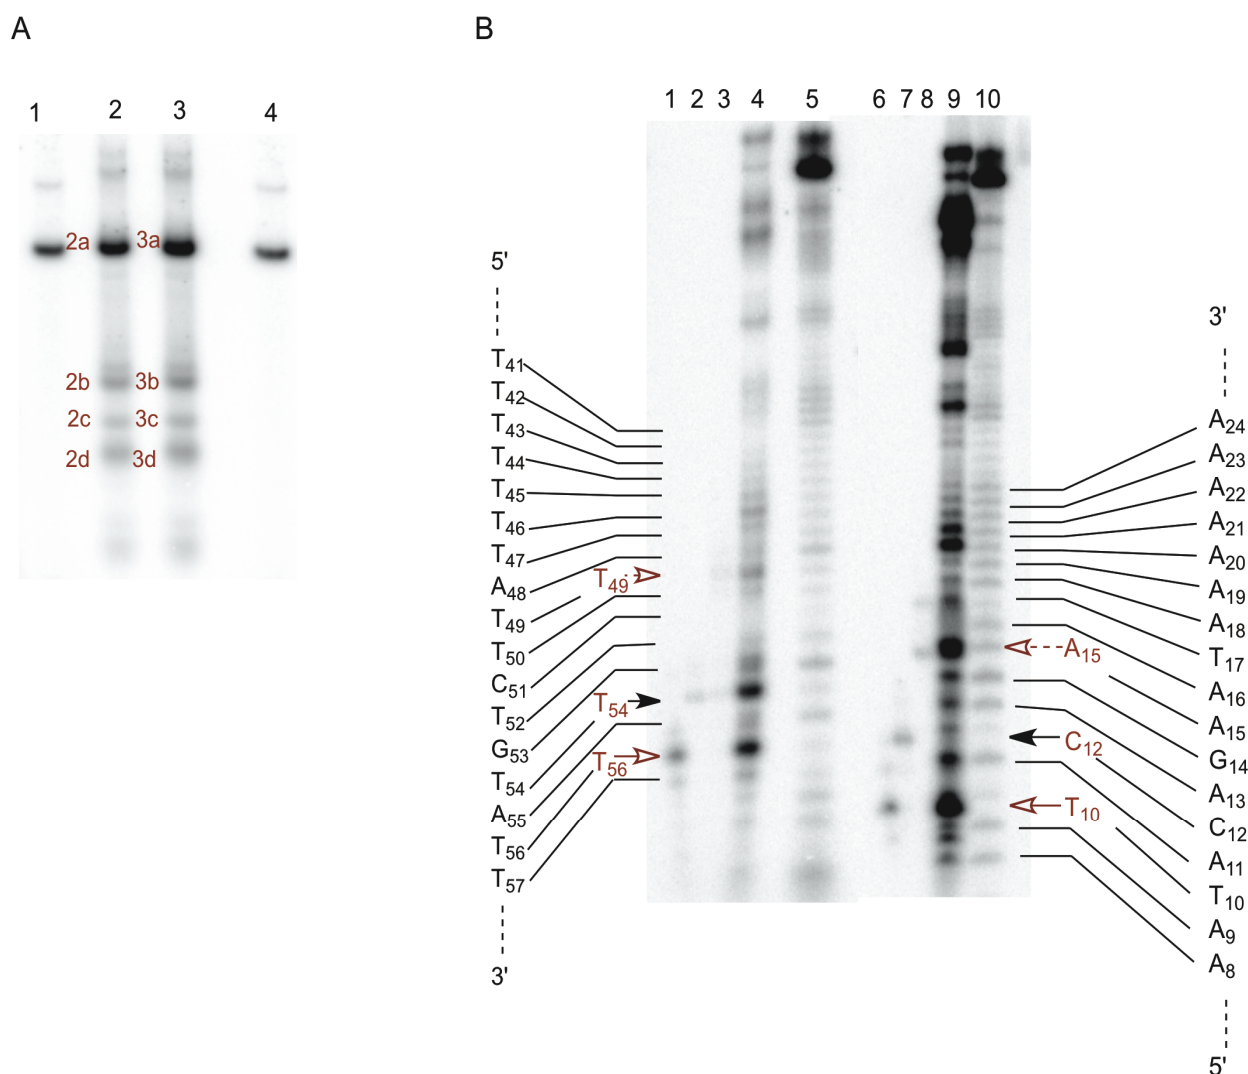

**Figure S5.** Analysis of Fe•bleomycin induced double-strand cleavage sites on hairpin DNA **5**. (A) Double strand cleavage of [3'-<sup>32</sup>P]-end labeled (lanes 1 and 2) and [5'-<sup>32</sup>P]-end labeled (lanes 3 and 4) 64-nucleotide hairpin DNA **5** by bleomycin A<sub>5</sub>. Lane 1, [3'-<sup>32</sup>P]-end labeled DNA alone; lane 2, 5 μM Fe(II)•BLM A<sub>5</sub>; lane 3, 5 μM Fe(II)•BLM A<sub>5</sub>; lane 4, [5'-<sup>32</sup>P]-end labeled DNA alone. (B) Sequencing gel analysis of bleomycin induced double-strand cleavage sites on [3'-<sup>32</sup>P]-end labeled (lanes 1-5) and [5'-<sup>32</sup>P]-end labeled (lanes 6-10) DNA **5**. Each lane (except lanes 5 and 10) corresponds to a numbered cleavage band, shown in (A). Lane 1, band 2d; lane 2, band 2c; lane 3, band 2b; lane 4, band 2a; lane 5, Maxam-Gilbert G+A sequencing lane of [3'-<sup>32</sup>P]-end labeled DNA **5**; lane 6, band 3d; lane 7, band 3c; lane 8, band 3b; lane 9, band 3a; Lane 10, Maxam-Gilbert G+A sequencing lane of [5'-<sup>32</sup>P]-end labeled DNA **5**.

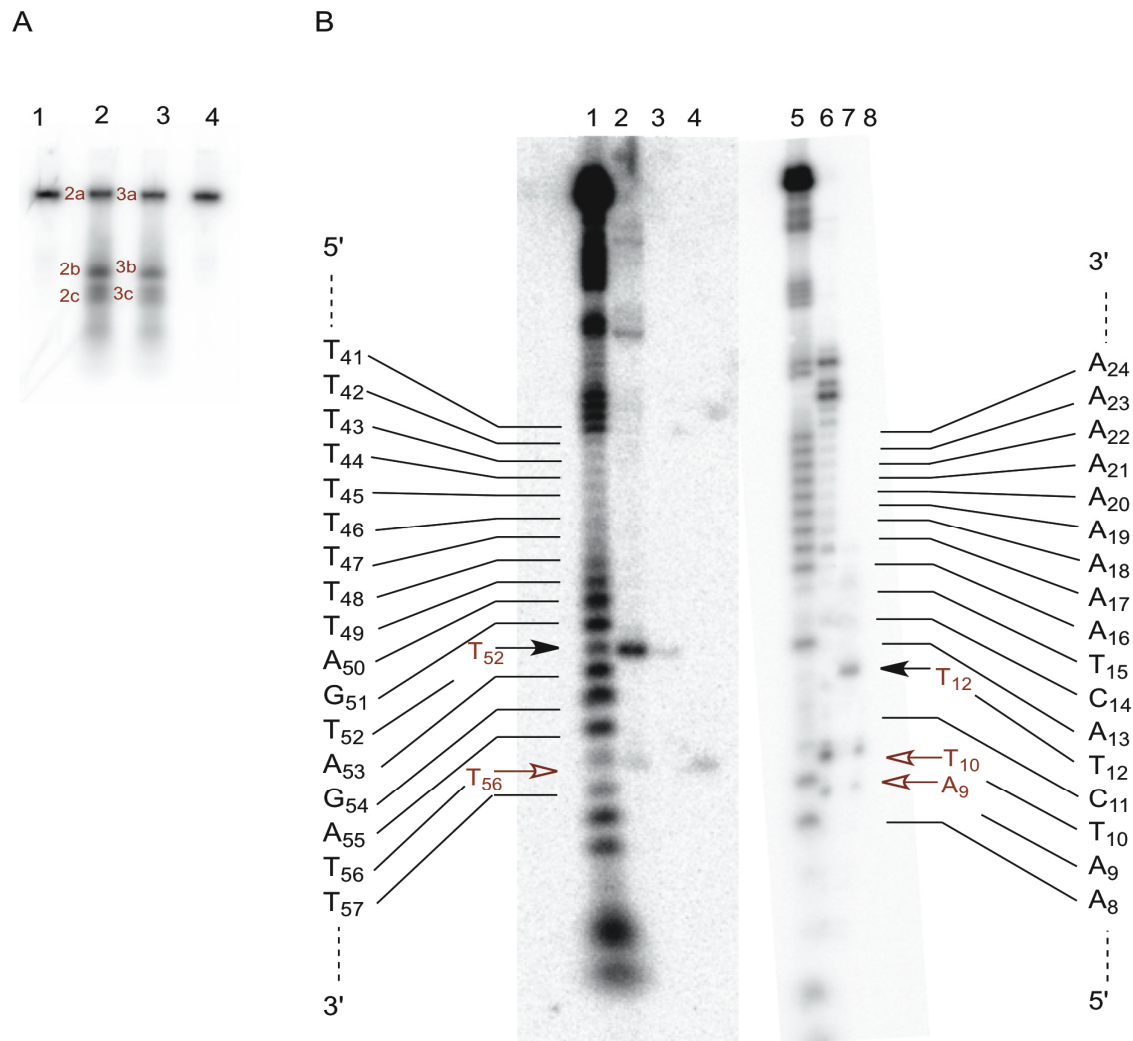

**Figure S6.** Analysis of Fe•bleomycin induced double-strand cleavage sites on hairpin DNA **6**. (A) Double strand cleavage of [3'-<sup>32</sup>P]-end labeled (lanes 1 and 2) and [5'-<sup>32</sup>P]-end labeled (lanes 3 and 4) 64-nucleotide hairpin DNA **6** by bleomycin A<sub>5</sub>. Lane 1, [3'-<sup>32</sup>P]-end labeled DNA alone; lane 2, 5 μM Fe(II)•BLM A<sub>5</sub>; lane 3, 5 μM Fe(II)•BLM A<sub>5</sub>; lane 4, [5'-<sup>32</sup>P]-end labeled DNA alone. (B) Sequencing gel analysis of bleomycin induced double-strand cleavage sites on [3'-<sup>32</sup>P]-end labeled (lanes 1-4) and [5'-<sup>32</sup>P]-end labeled (lanes 5-8) DNA **6**. Each lane (except lanes 1 and 5) corresponds to a numbered cleavage band, shown in (A). Lane 1, Maxam-Gilbert G+A sequencing lane of [3'-<sup>32</sup>P]-end labeled DNA **6**; lane 2, band 2a; lane 3, band 2b; lane 4, band 2c; lane 5, Maxam-Gilbert G+A sequencing lane of [5'-<sup>32</sup>P]-end labeled DNA **6**; lane 6, band 3a; lane 7, band 3b; lane 8, band 3c.



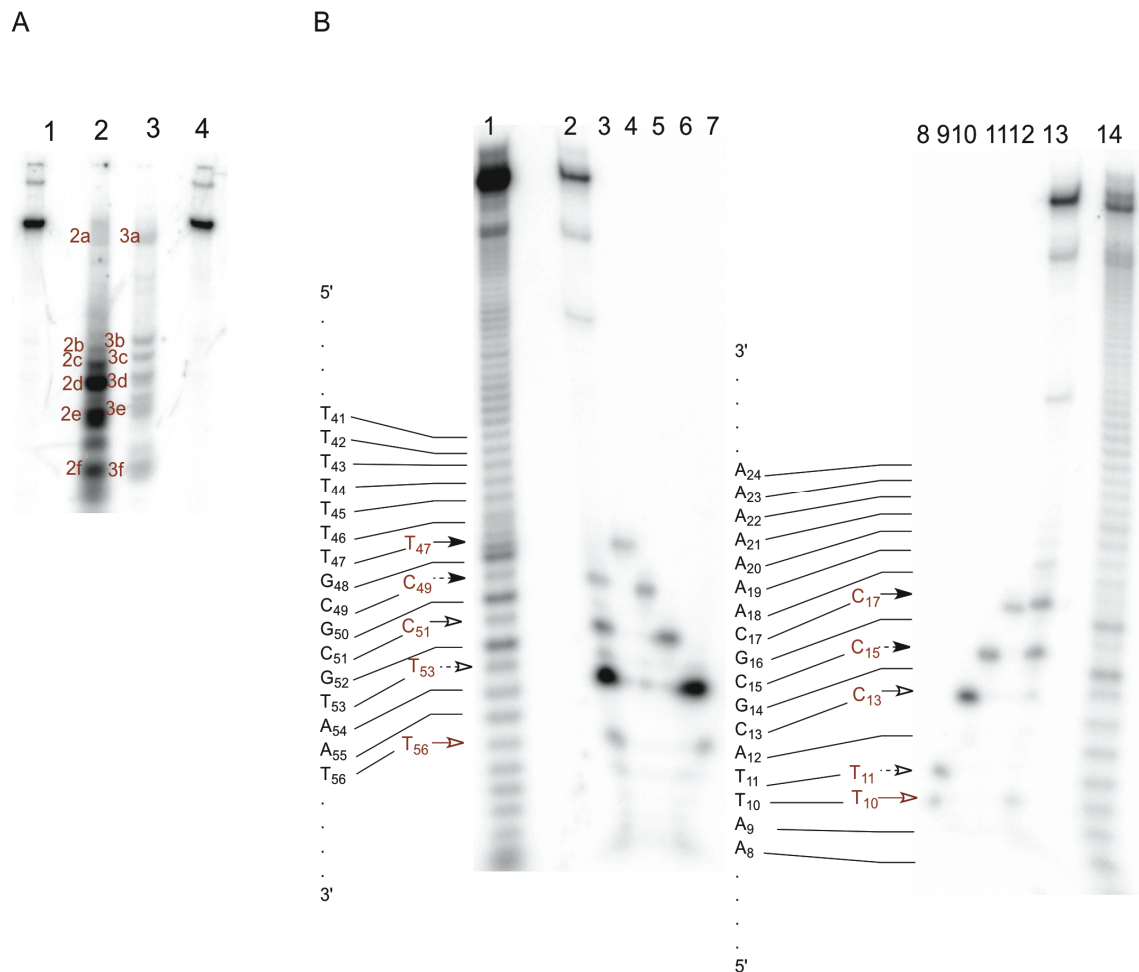

**Figure S7.** Analysis of Fe•bleomycin induced double-strand cleavage sites on hairpin DNA 7. (A) Double strand cleavage of  $[3'-^{32}\text{P}]$ -end labeled (lanes 1 and 2) and  $[5'-^{32}\text{P}]$ -end labeled (lanes 3 and 4) 64-nucleotide hairpin DNA 7 by bleomycin A<sub>5</sub>. Lane 1,  $[3'-^{32}\text{P}]$ -end labeled DNA alone; lane 2, 5  $\mu\text{M}$  Fe(II)•BLM A<sub>5</sub>; lane 3, 5  $\mu\text{M}$  Fe(II)•BLM A<sub>5</sub>; lane 4,  $[5'-^{32}\text{P}]$ -end labeled DNA alone. (B) Sequencing gel analysis of bleomycin induced double-strand cleavage sites on  $[3'-^{32}\text{P}]$ -end labeled (lanes 1-7) and  $[5'-^{32}\text{P}]$ -end labeled (lanes 8-14) DNA 7. Each lane (except lanes 1 and 14) corresponds to a numbered cleavage band, shown in (A). Lane 1, Maxam-Gilbert G+A sequencing lane of  $[3'-^{32}\text{P}]$ -end labeled DNA 7; lane 2, band 2a; lane 3, band 2b; lane 4, band 2c; lane 5, band 2d; lane 6, band 2e; lane 7, band 2f; Lane 8, band 3f; lane 9, band 3e; lane 10, band 3d; lane 11, band 3c; lane 12, band 3b; lane 13, band 3a; lane 14, Maxam-Gilbert G+A sequencing lane of  $[5'-^{32}\text{P}]$ -end labeled DNA 7.



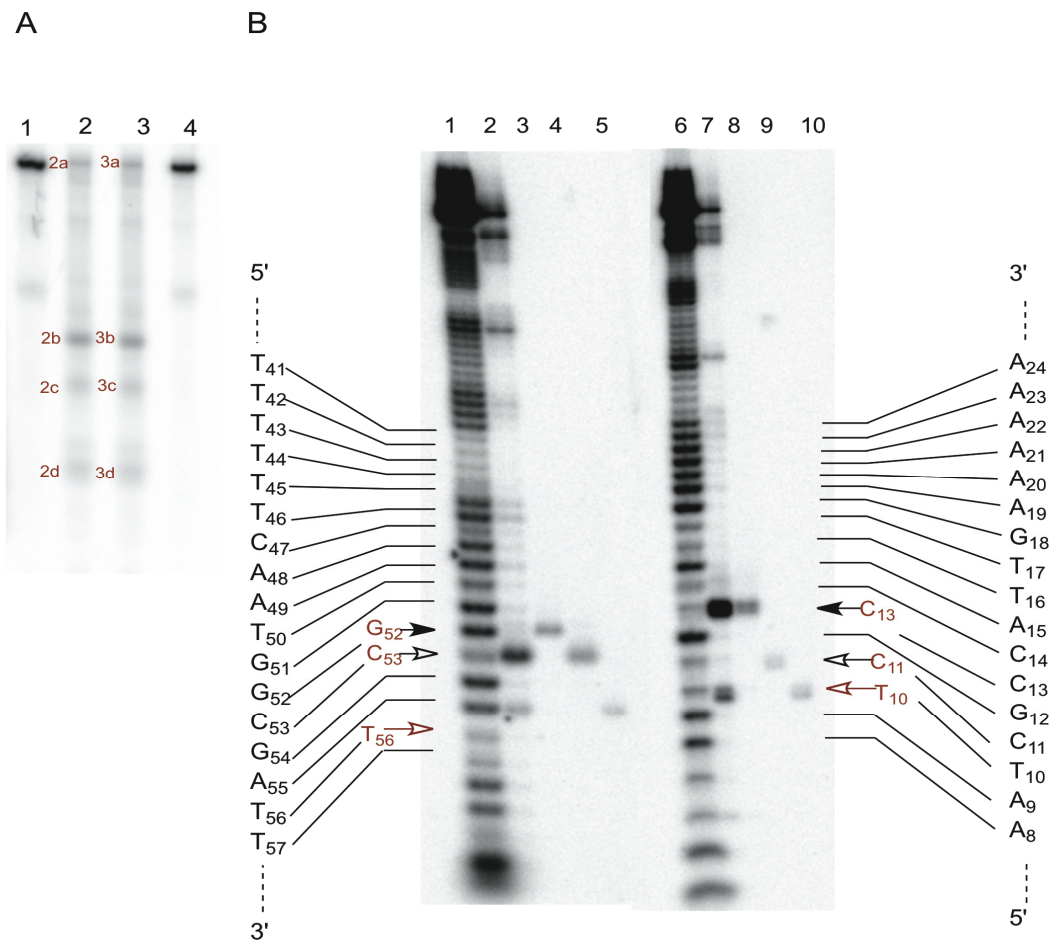

**Figure S8.** Analysis of Fe•bleomycin induced double-strand cleavage sites on hairpin DNA **10**. (A) Double strand cleavage of [3'-<sup>32</sup>P]-end labeled (lanes 1 and 2) and [5'-<sup>32</sup>P]-end labeled (lanes 3 and 4) 64-nucleotide hairpin DNA **10** by bleomycin A<sub>5</sub>. Lane 1, [3'-<sup>32</sup>P]-end labeled DNA alone; lane 2, 5 μM Fe(II)•BLM A<sub>5</sub>; lane 3, 5 μM Fe(II)•BLM A<sub>5</sub>; lane 4, [5'-<sup>32</sup>P]-end labeled DNA alone. (B) Sequencing gel analysis of bleomycin induced double-strand cleavage sites on [3'-<sup>32</sup>P]-end labeled (lanes 1-5) and [5'-<sup>32</sup>P]-end labeled (lanes 6-10) DNA **10**. Each lane (except lanes 1 and 6) corresponds to a numbered cleavage band, shown in (A). Lane 1, Maxam-Gilbert G+A sequencing lane of [3'-<sup>32</sup>P]-end labeled DNA **10**; lane 2, band 2a; lane 3, band 2b; lane 4, band 2c; lane 5, band 2d; lane 6, Maxam-Gilbert G+A sequencing lane of [5'-<sup>32</sup>P]-end labeled DNA **10**; lane 7, band 3a; lane 8, band 3b; lane 9, band 3c; Lane 10, band 3d.
